# Supplementary material for: Fe2O3/SiO2 composite aerogels powders for high-temperature thermal insulation based on EDTA chelated aqueous precursor
Source: Research Square preprint supplement (doi:10.21203/rs.3.rs-7692578/v1), 2025-10-13
Supplement: Supplementary file 1 [file e532dbc2457aaaaf9380b01b.docx]

**Fe2O3/SiO2 composite aerogels powders for high-temperature thermal insulation based on EDTA chelated aqueous precursor**

Yuan Qia,b, Jinmin Wanga*, Xingxing Zhangb, Yongqing Wub, Xiangdong Gaob*

*a.School of Materials and Chemistry, University of Shanghai for Science and Technology, 516 Jungong Road, Shanghai, 200093, P.R. China.*

*b.Shanghai Institute of Ceramics, Chinese Academy of Sciences, No. 1295 Dingxi Road, Shanghai, 200050, P.R. China.*


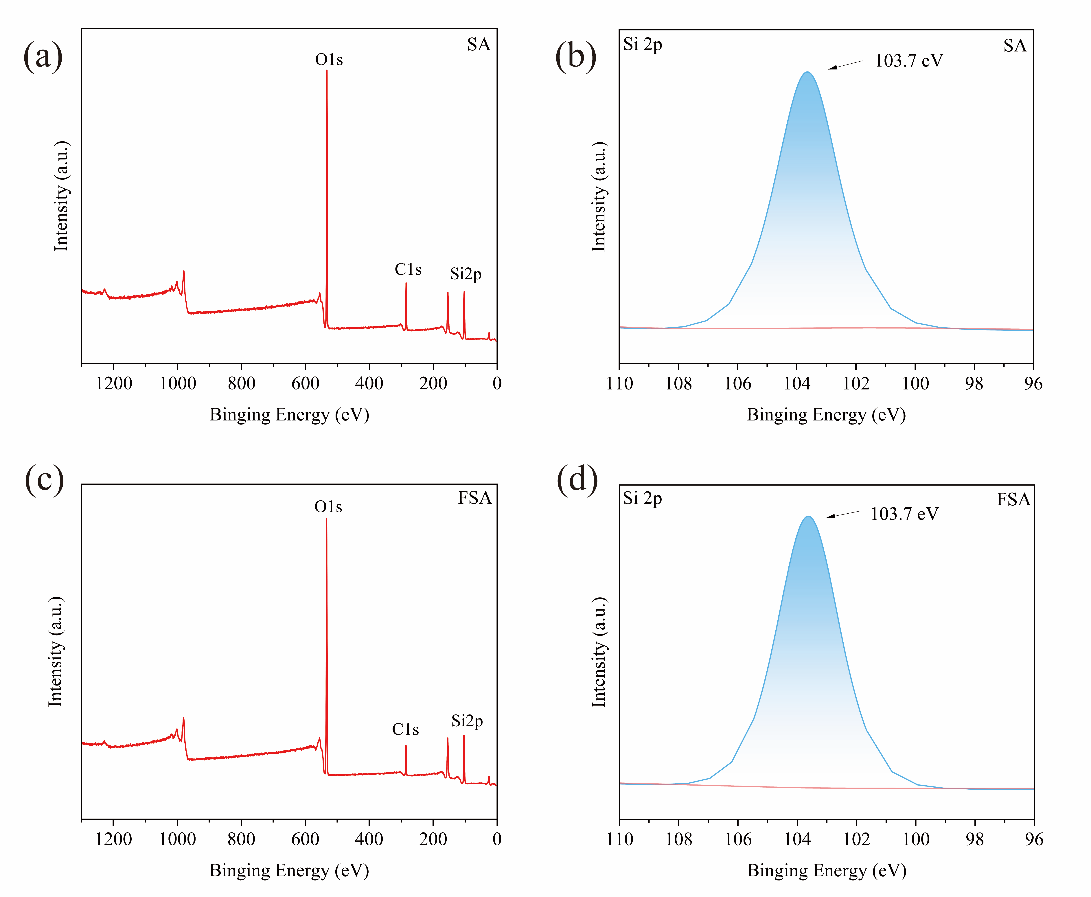


**Fig. S1** XPS spectra of FSA7 and SA: **(a)** survey spectra of SA; **(b)** Si 2p of SA; **(c)** survey spectra of SA; **(d)** Si 2p of SA.


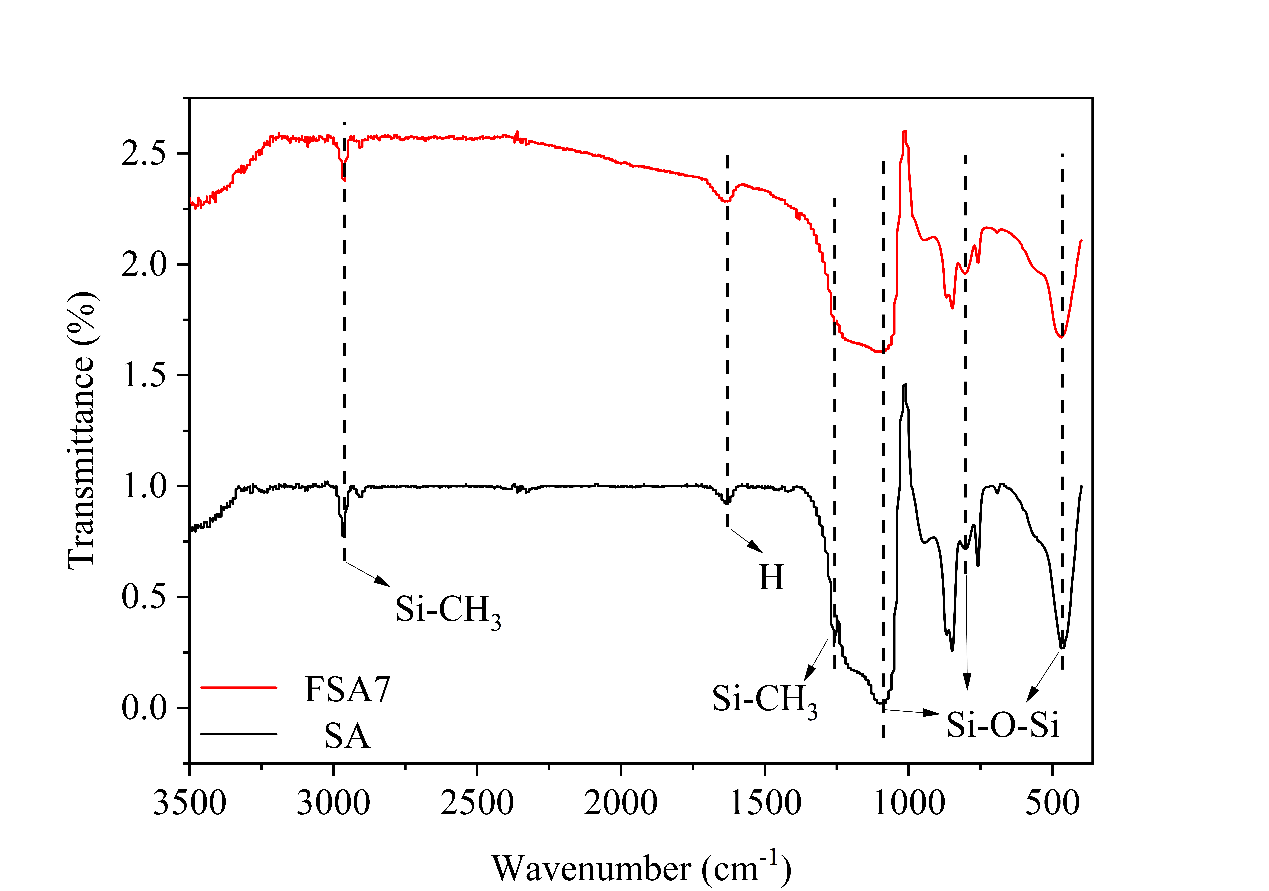


**Fig. S2** FTIR spectra of FSA7 and SA.


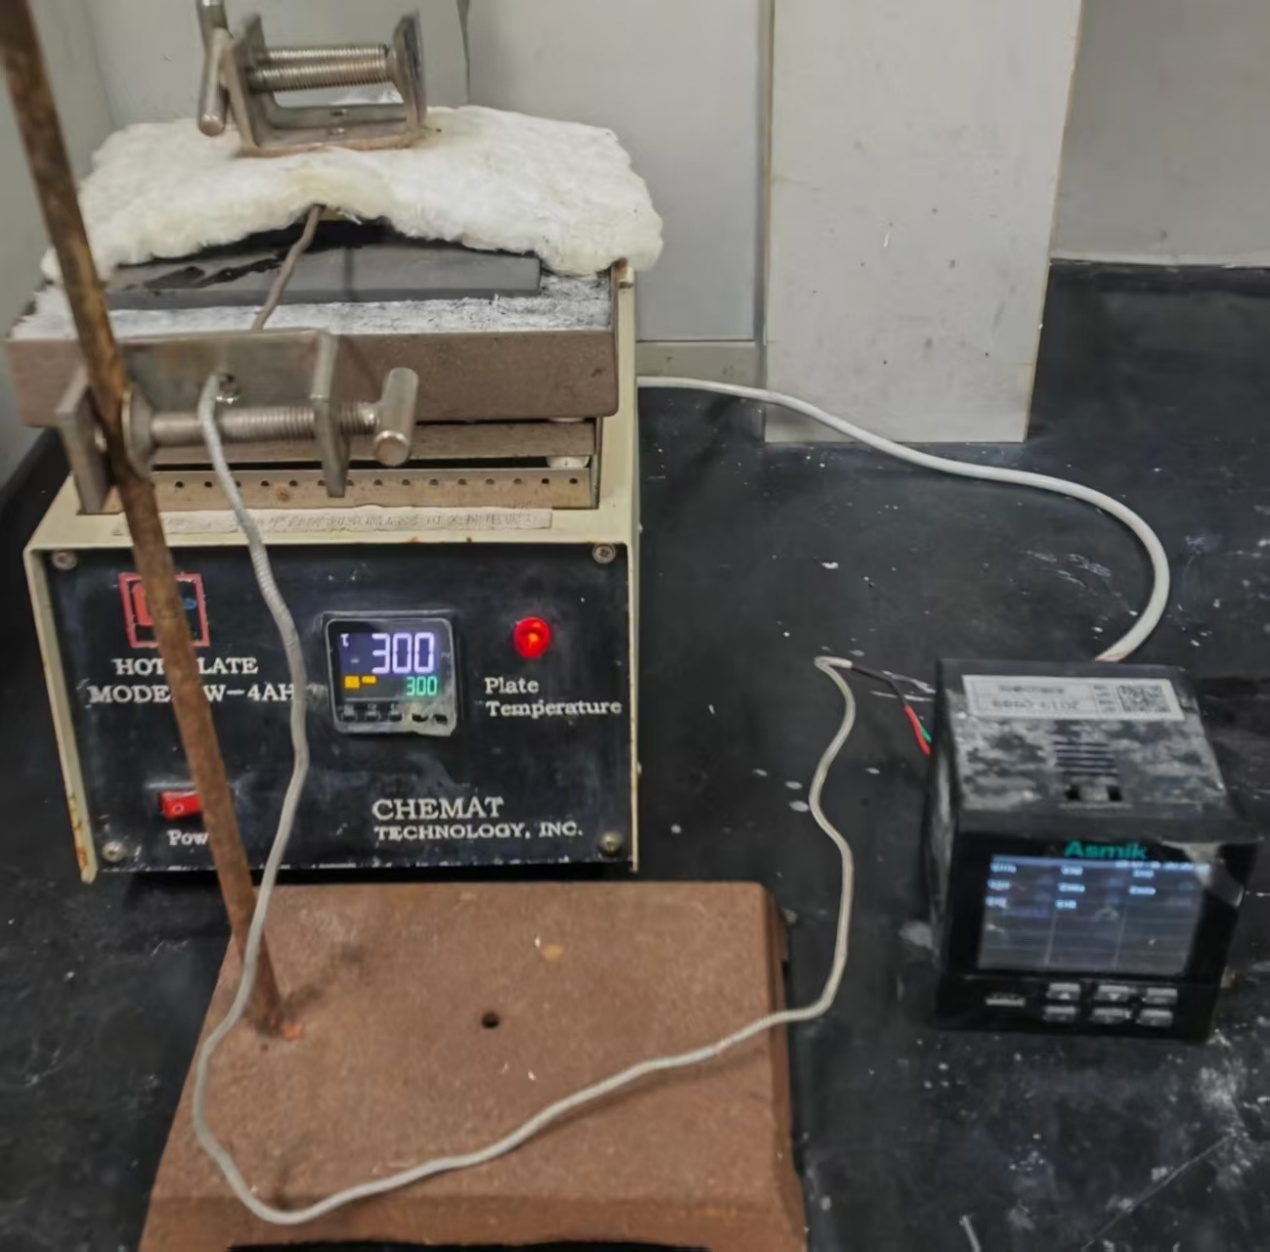


**Fig. S3** Homemade single-side heater.

**
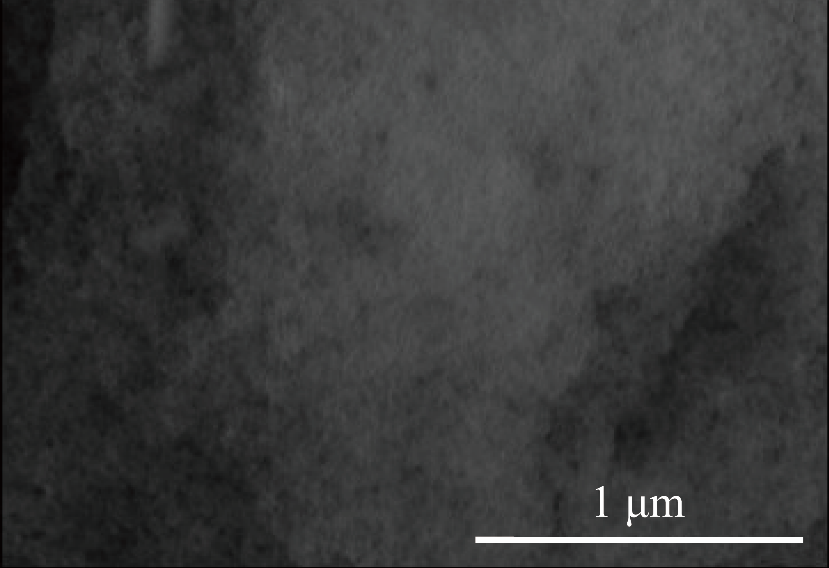
**

**Fig. S4** SEM image of FSA7 for EDS elemental analysis.
